# Supplementary material for: What We Know So Far about the Metabolite-Mediated Microbiota-Intestinal Immunity Dialogue and How to Hear the Sound of This Crosstalk
Source: MDPI journal article supplement (doi:10.3390/metabo11060406), 2021-06-21
Supplement: s1 [file s1]

**Table S1:** Summarizing table of Microbiota-derived metabolites that modulate host immunity in the gut.

| Metabolite:                 |                  | Major Effects:                                                                                                                                                                                                                                                                                                                          | Ref:                |
|-----------------------------|------------------|-----------------------------------------------------------------------------------------------------------------------------------------------------------------------------------------------------------------------------------------------------------------------------------------------------------------------------------------|---------------------|
| SCFAs                       |                  | <ul style="list-style-type: none"> <li>• Maintain intestinal barrier integrity</li> <li>• Induce of tolerogenic DC</li> <li>• Butyrate promotes regulatory T cells and IL22 production</li> </ul>                                                                                                                                       | [28,29,31,32,35–37] |
|                             |                  |                                                                                                                                                                                                                                                                                                                                         |                     |
|                             |                  |                                                                                                                                                                                                                                                                                                                                         |                     |
| Lactate                     |                  | <ul style="list-style-type: none"> <li>• Suppresses the inflammation through the activation of GPR81 on DCs and macrophages</li> <li>• Promotes M2 polarization</li> <li>• Inhibits the activation of IECs</li> <li>• Decreases the proliferation of effector T cells and increases the conversion of naive T cells to Tregs</li> </ul> | [52,53,54,56]       |
|                             |                  |                                                                                                                                                                                                                                                                                                                                         |                     |
|                             |                  |                                                                                                                                                                                                                                                                                                                                         |                     |
|                             |                  |                                                                                                                                                                                                                                                                                                                                         |                     |
| Succinate                   |                  | <ul style="list-style-type: none"> <li>• Activates the SUCNR1 receptor and enhances its synthesis on macrophages</li> <li>• Potent activator of tuft cells and leads to the activation of ILC2s</li> </ul>                                                                                                                              | [61,62,66–68]       |
|                             |                  |                                                                                                                                                                                                                                                                                                                                         |                     |
| B Vitamins                  | Thiamine         | <ul style="list-style-type: none"> <li>• Required in lymphocyte survival</li> </ul>                                                                                                                                                                                                                                                     | [86]                |
|                             | Riboflavin       | <ul style="list-style-type: none"> <li>• Decreases TNF-alpha production by macrophages</li> <li>• Enhances ROS production and phagocytic activity of macrophages</li> <li>• Lessens clinical symptoms and systemic inflammation in patients with Crohn's disease</li> </ul>                                                             | [90,91,95,96]       |
|                             |                  |                                                                                                                                                                                                                                                                                                                                         |                     |
|                             | Niacin           | <ul style="list-style-type: none"> <li>• Regulates ROS production by macrophages and neutrophils</li> <li>• Enhances neutrophils recruitment and activity</li> <li>• Promotes T-helper activation</li> </ul>                                                                                                                            | [103–105]           |
|                             |                  |                                                                                                                                                                                                                                                                                                                                         |                     |
|                             | Pantothenic acid | <ul style="list-style-type: none"> <li>• Enhances cytokines production and bacterial clearance in <i>M. tuberculosis</i> infection</li> </ul>                                                                                                                                                                                           | [108]               |
|                             | Pyridoxine       | <ul style="list-style-type: none"> <li>• Polarizes T-helpers towards a Th1 profile</li> </ul>                                                                                                                                                                                                                                           | [122–124]           |
|                             | Biotin           | <ul style="list-style-type: none"> <li>• Correlates to histological gut inflammation in IBD-mice</li> <li>• Enhances IL-17 and INF-<math>\gamma</math> production in T lymphocytes</li> </ul>                                                                                                                                           | [128,129]           |
|                             |                  |                                                                                                                                                                                                                                                                                                                                         |                     |
|                             | Folate           | <ul style="list-style-type: none"> <li>• Blood levels correlate to asthma severity and circulating lymphocyte levels in allergic children</li> </ul>                                                                                                                                                                                    | [142]               |
|                             | Cyanocobalamin   | <ul style="list-style-type: none"> <li>• Blood levels correlate to severity of infectious diseases in hospitalized patients</li> </ul>                                                                                                                                                                                                  | [138,139]           |
| Tryptophan- derived indoles |                  | <ul style="list-style-type: none"> <li>• Increase the expression of IL10R1 in epithelial cells</li> <li>• Increase the production of IL-22 in IELs</li> <li>• Increase the number of ILC3 producing IL-22</li> </ul>                                                                                                                    | [154,158,160]       |
|                             |                  |                                                                                                                                                                                                                                                                                                                                         |                     |
|                             |                  |                                                                                                                                                                                                                                                                                                                                         |                     |
| Taurine                     |                  | <ul style="list-style-type: none"> <li>• Increases the number of lymphocytes in Peyer's patches</li> <li>• Activator of the NLRP6 inflammasome and induces the production of AMPs</li> </ul>                                                                                                                                            | [168]               |
|                             |                  |                                                                                                                                                                                                                                                                                                                                         |                     |
| <i>p</i> -Cresol            |                  | <ul style="list-style-type: none"> <li>• Inhibits the proliferation of CD43+ B-cell progenitor</li> <li>• Increases ROS and Phagocytosis in macrophages</li> <li>• Suppresses IFN-<math>\gamma</math>-producing Th1 cells and favors a Th2 response</li> </ul>                                                                          | [174,175,176]       |
|                             |                  |                                                                                                                                                                                                                                                                                                                                         |                     |
|                             |                  |                                                                                                                                                                                                                                                                                                                                         |                     |

|                      |                                                                                                                                                                                                                                                                                                                                                      |                               |
|----------------------|------------------------------------------------------------------------------------------------------------------------------------------------------------------------------------------------------------------------------------------------------------------------------------------------------------------------------------------------------|-------------------------------|
| Histidine            | <ul style="list-style-type: none"> <li>• It is a cytokine and inflammatory mediator in acute inflammation and hypersensitivity</li> <li>• Promotes Th1 response through H1R while H2R activation induces polarization into regulatory T cells</li> <li>• Diminution of IL-18 production through inhibition of NLRP6 inflammasome assembly</li> </ul> | [169,179,183–185]             |
| Spermine             | <ul style="list-style-type: none"> <li>• Reduces the expression of pro-inflammatory cytokines produced by monocytes and macrophages</li> </ul>                                                                                                                                                                                                       | [193,194]                     |
| Spermidine           | <ul style="list-style-type: none"> <li>• Reduces monocyte-derived pro-inflammatory cytokines production</li> <li>• Controls the differentiation of naïve T cell to FoxP3+ T cells.</li> </ul>                                                                                                                                                        | [201,202]                     |
| D-amino acids        | <ul style="list-style-type: none"> <li>• Metabolized by the epithelium to generate H<sub>2</sub>O<sub>2</sub></li> </ul>                                                                                                                                                                                                                             |                               |
| GABA                 | <ul style="list-style-type: none"> <li>• Increases the production of IL-17</li> <li>• Stimulates mucin-1 expression in epithelial cells</li> <li>• Decreases IL-1<math>\beta</math>, increases tight junction and TGF-<math>\beta</math> in epithelial cells</li> </ul>                                                                              | [213,214,215]                 |
| QSMs                 | <ul style="list-style-type: none"> <li>• Elicit proinflammatory effects and modulate the activities of gut-associated T lymphocytes, macrophages, DCs, and neutrophils</li> <li>• Induce Mast cells degranulation and release of ROS, TNF-<math>\alpha</math>, and Prostaglandin D2</li> </ul>                                                       | [221,222]                     |
| Catecholamines       | <ul style="list-style-type: none"> <li>• Act as potential inter-kingdom signaling molecules in the gut</li> <li>• Exert autoregulatory functions on immune cells by means of intracellular oxidative mechanisms</li> </ul>                                                                                                                           | [234,245]                     |
| CDNs and CTNs        | <ul style="list-style-type: none"> <li>• Induce either STING or RECON and induces antibacterial activity</li> </ul>                                                                                                                                                                                                                                  | [249,250,251]                 |
| Inosine              | <ul style="list-style-type: none"> <li>• Activates the adenosine 2A receptor and drive Th1 differentiation</li> </ul>                                                                                                                                                                                                                                | [252]                         |
| Secondary Bile acids | <ul style="list-style-type: none"> <li>• Negative regulator of macrophages, DC and NK</li> <li>• Maintain a tolerogenic environment in the liver and in the intestine</li> <li>• Promote generation of colonic ROR<math>\gamma</math>t-expressing FoxP3+ Tregs</li> </ul>                                                                            | [255,256,257,258,260]         |
| Sphingolipids        | <ul style="list-style-type: none"> <li>• Preserve the integrity of the intestinal barrier</li> <li>• Bacteroides-derived sphingolipids have anti-inflammatory properties</li> <li>• Prevent accumulation of colonic iNKT</li> <li>• Protecting effect on intestinal mucosa</li> </ul>                                                                | [266,271,270]                 |
| Lipoteichoic acids   | <ul style="list-style-type: none"> <li>• Immunostimulatory properties through TLR2 on monocytes and macrophages</li> <li>• Involve in the antibacterial immune response</li> </ul>                                                                                                                                                                   | [277,279,280,281–283,285,287] |
